# Supplementary material for: Ipragliflozin-induced adipose expansion inhibits cuff-induced vascular remodeling in mice
Source: Springer Nature journal article supplement (doi:10.1186/s12933-019-0886-1), 2019-06-24

## **SUPPLEMENTAL MATERIAL**

### **Ipragliflozin-induced adipose expansion inhibits cuff-induced vascular remodeling in mice**

Kentaro Mori, Kyoichiro Tsuchiya, Suguru Nakamura, Yasutaka Miyachi,  
Kumiko Shiba, Yoshihiro Ogawa, Kenichiro Kitamura

## **SUPPLEMENTAL FIGURE LEGENDS**

### **Supplemental Figure 1. Plasma lipid profile, and histology and gene expression in thoracic PVAT of Ipra-treated WD-fed mice.**

(A) Epi weight to body weight ratio of Ipra-treated WD-fed mice. (B) Plasma total cholesterol, triglyceride and non-esterified fatty-acid (NEFA) levels after 10 weeks of Ipra treatment. (C) Hematoxylin and eosin (HE) staining, and (D) gene expression levels in thoracic PVAT 10 weeks after Ipra treatment. NEFA, Non-esterified Fatty Acid. Original magnification,  $\times 200$ . \*  $p < 0.05$ , \*\*  $p < 0.01$  vs SD.  $n = 6-8$ .

### **Supplemental Figure 2. Concentration of FABP4 in conditioned medium of Epi and plasma of Ipra-treated WD-fed mice.**

Concentration of FABP4 in (A) conditioned medium (CM) of Epi and abdominal PVAT, and (B) plasma of SD or Ipra-treated WD-fed mice. \*\*  $p < 0.01$  vs SD, #  $p < 0.05$ , ##  $p < 0.01$  vs WD.  $n = 6-8$ .

### **Supplemental Figure 3. Implanted adipose tissue 4 weeks after surgery.**

A representative picture of implanted Epi 4 weeks after surgery.

**Supplemental Table.** List of primers.

---

|                |    |                         |
|----------------|----|-------------------------|
| <i>Fabp4</i>   | Fw | AGACGACAGGAAGGTGAAGA    |
|                | Rv | TAACACATTCCACCACCAGC    |
| <i>Nampt</i>   | Fw | CAGTGGCCACAAATTCCAGA    |
|                | Rv | CCTATGCCAGCAGTCTCTTG    |
| <i>Angptl2</i> | Fw | CACCTACAACCGCATCATCA    |
|                | Rv | TCCATGGACCTGATGGCTTA    |
| <i>Pdgfb</i>   | Fw | CTTCCTCTCTGCTGCTACCT    |
|                | Rv | AGCCCCATCTTCATCTACGG    |
| <i>Ccl2</i>    | Fw | CCACTCACCTGCTGCTACTCAT  |
|                | Rv | TGGTGATCCTCTTGTAGCTCTCC |
| <i>Emr1</i>    | Fw | CTTTGGCTATGGGCTTCCAGTC  |
|                | Rv | GCAAGGAGGACAGAGTTTATCGT |
| <i>Ccr2</i>    | Fw | ACAAATCAAAGGAAATGGAAGAC |
|                | Rv | TGCCGTGGATGAACTGAGG     |
| <i>Col1a1</i>  | Fw | CCTCAGGGTATTGCTGGACAAC  |
|                | Rv | ACCACTTGATCCAGAAGGACCTT |
| <i>Col1a2</i>  | Fw | TTGCAATCGGGATCAGTACGA   |

|             |    |                       |
|-------------|----|-----------------------|
|             | Rv | CACGTGGTCCTCTGTCTCCAG |
| <i>Fn1</i>  | Fw | GCTGAAAGGACCCAATGTCT  |
|             | Rv | AGAATCCATCCCCACAGGAA  |
| <i>Lep</i>  | Fw | TCCAGGATGACACCAAACCC  |
|             | Rv | TGAAGTCCAAGCCAGTGACC  |
| <i>36b4</i> | Fw | GGCCCTGCACTCTCGCTTTC  |
|             | Rv | TGCCAGGACGCGCTTGT     |

---

Fw: forward primer, Rv: reverse primer

# Supplemental Figure 1

**A**

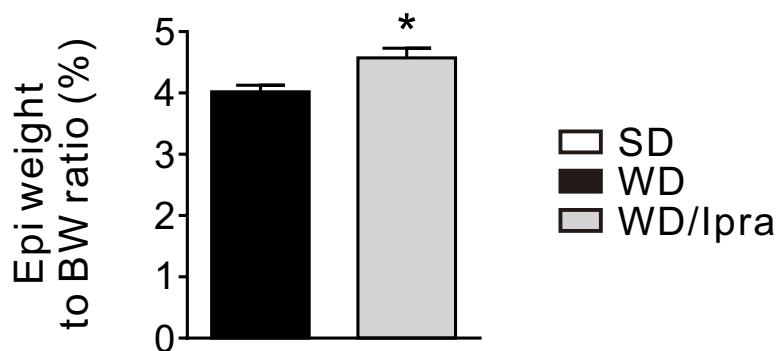

**B**

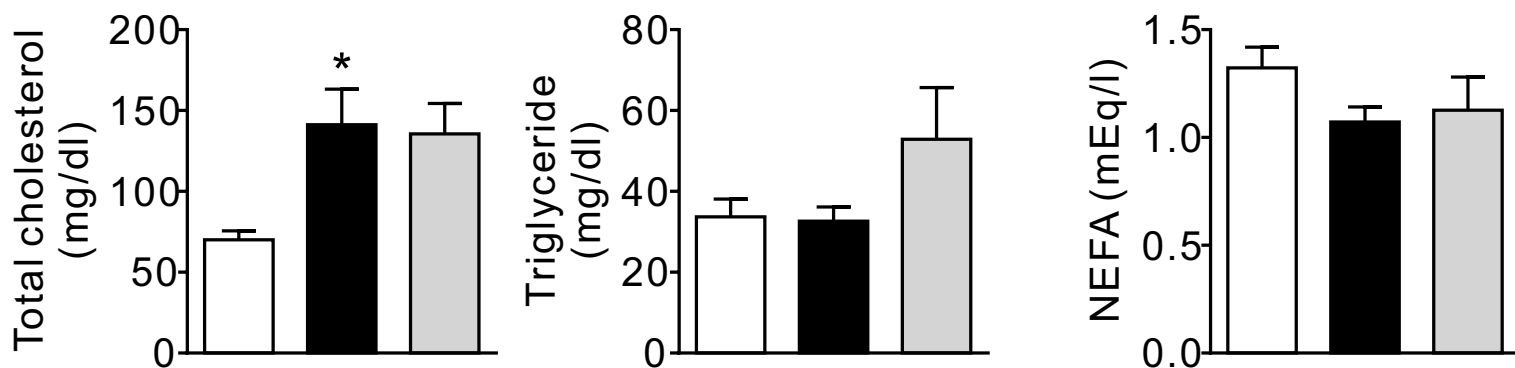

**C**

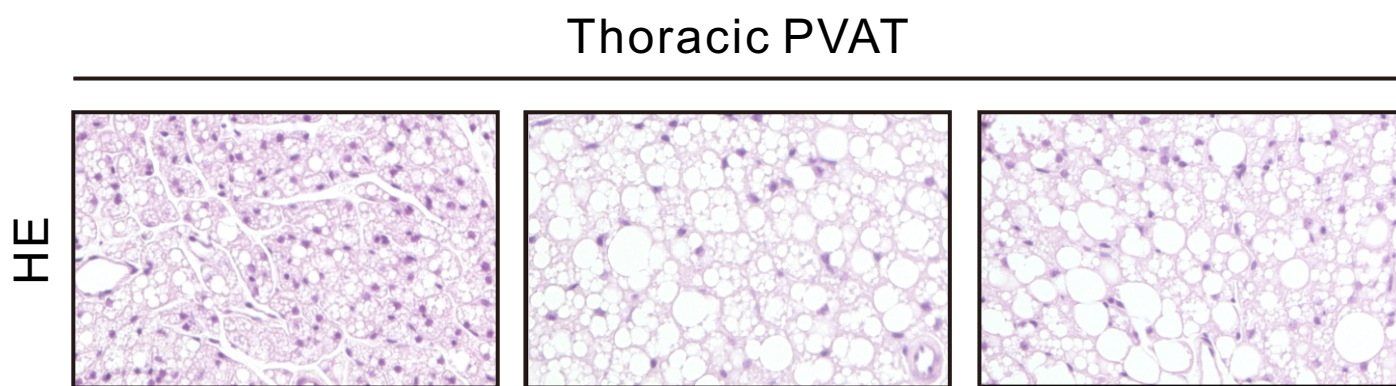

**D**

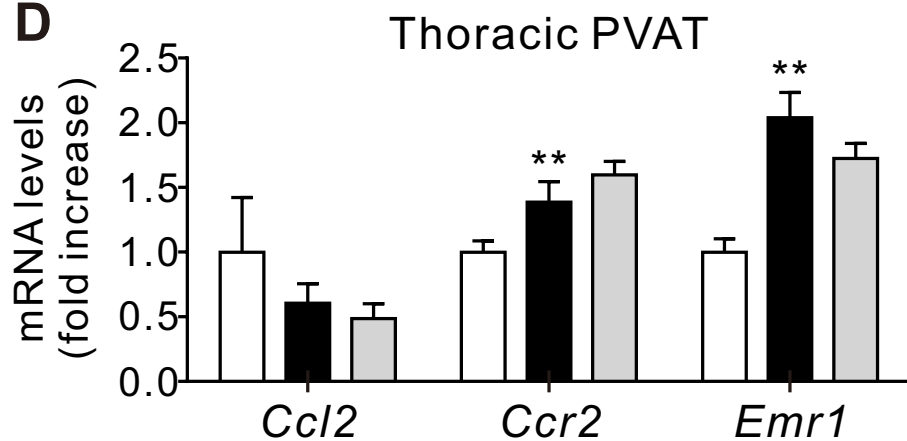

# Supplemental Figure 2

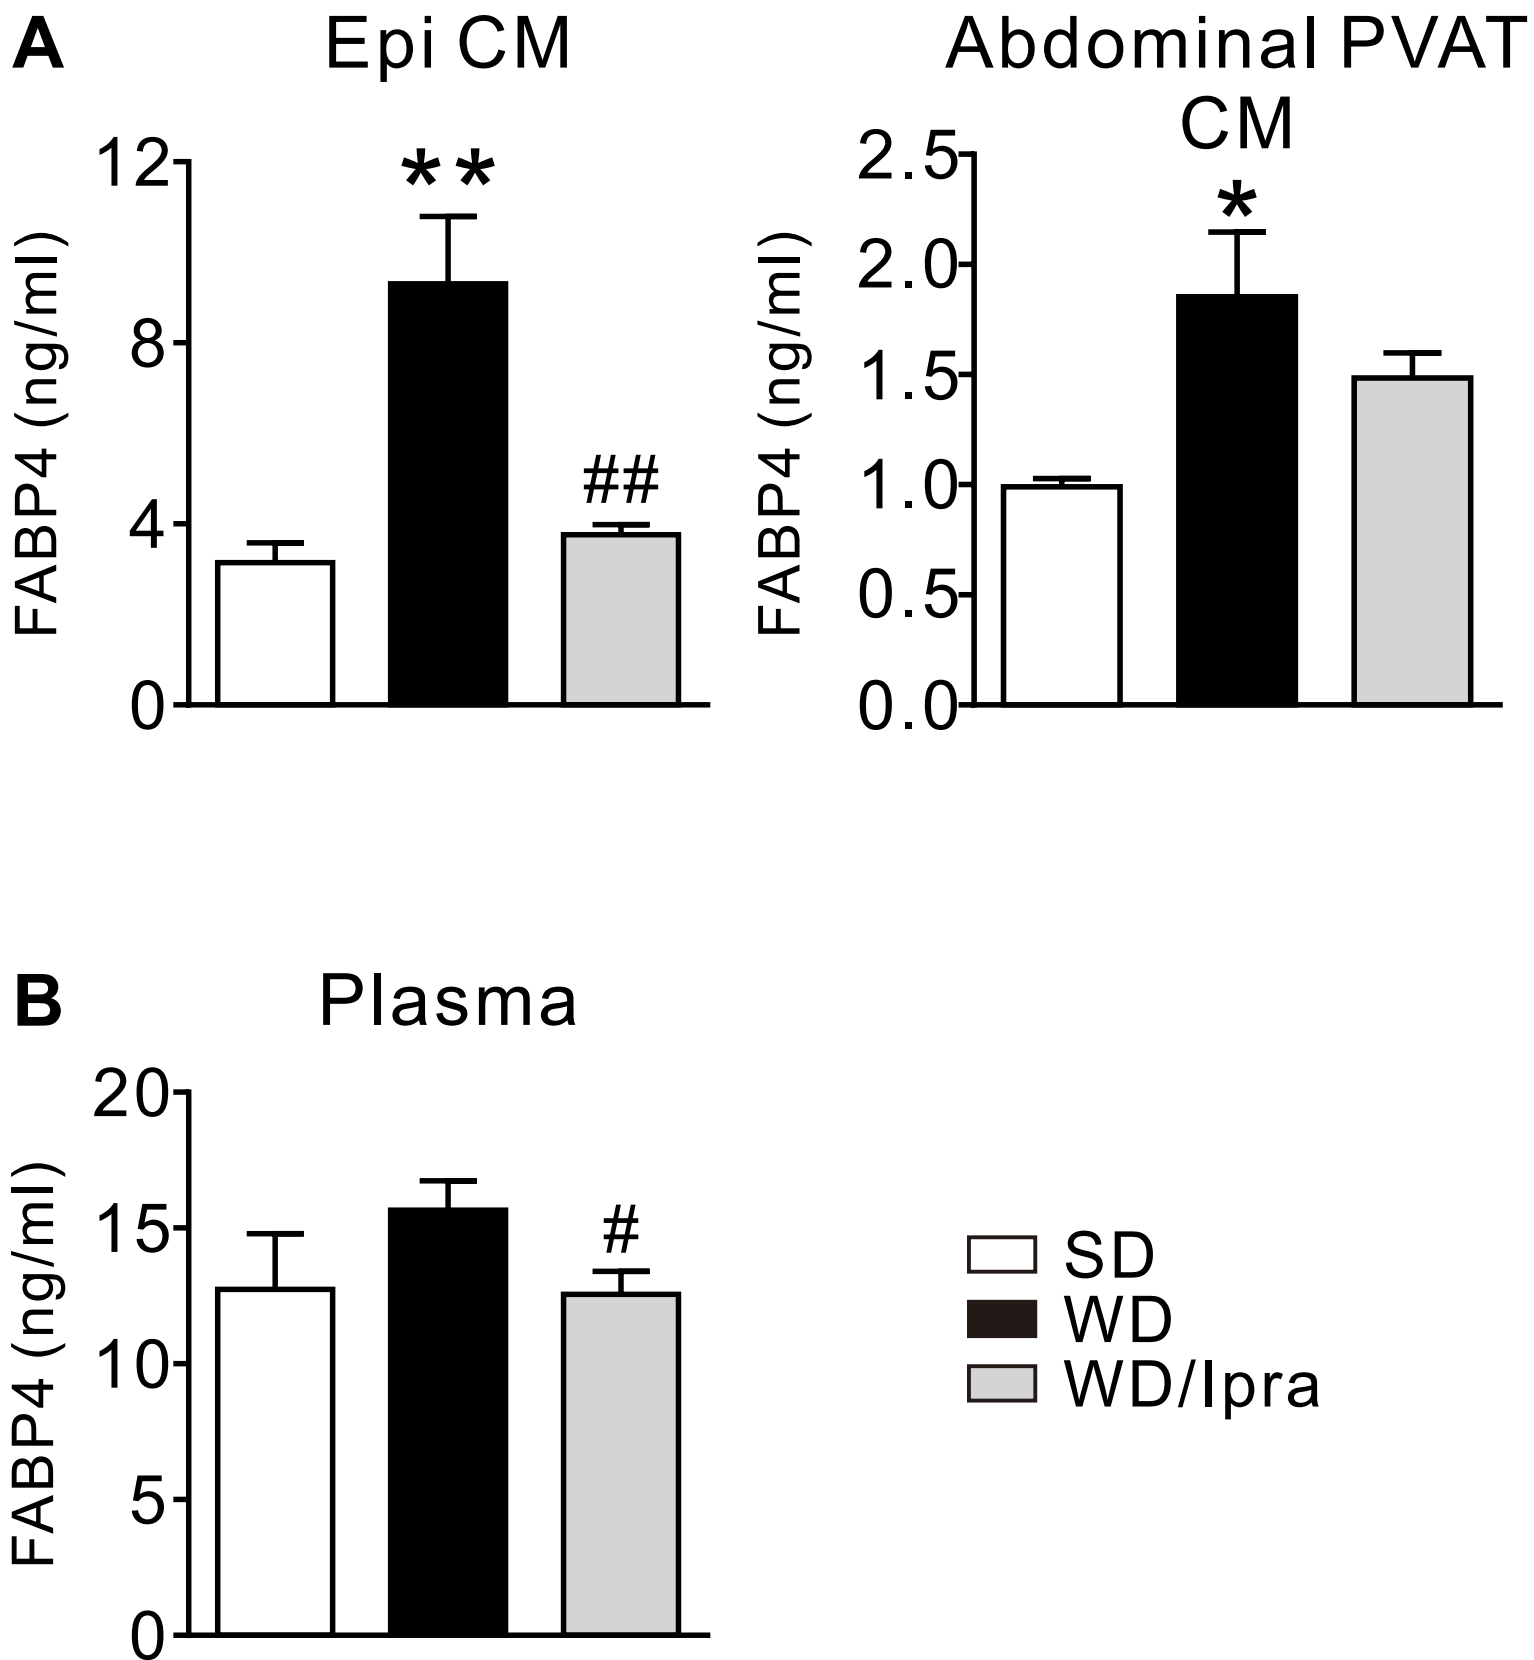

# Supplemental Figure 3

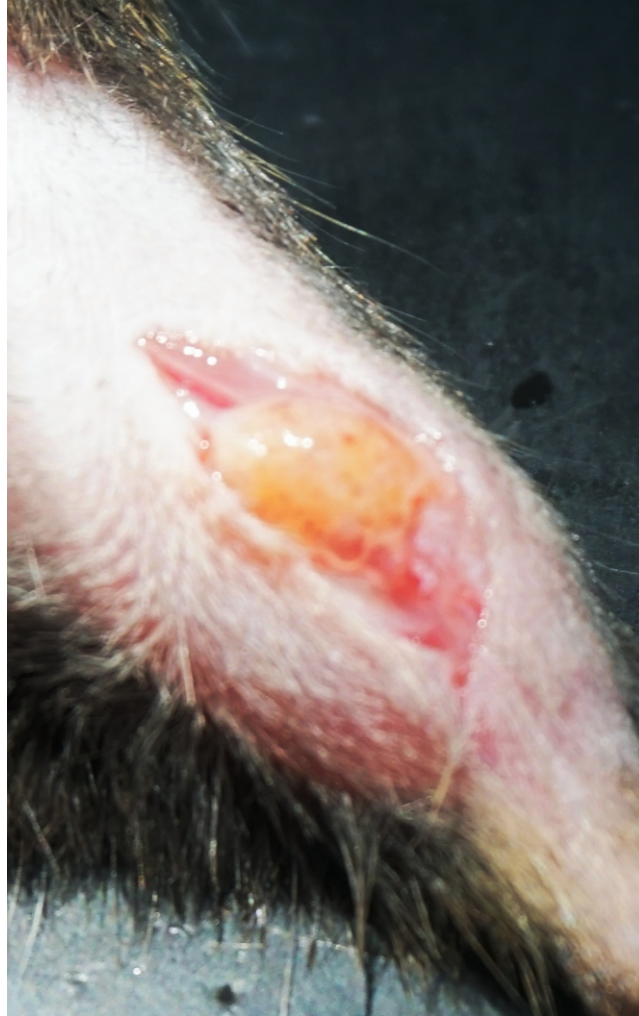

Supplement: MOESM1 [file 16847828]
